# Supplementary material for: Impact and efficacy of mobile health intervention in the management of diabetes and hypertension: a systematic review and meta-analysis
Source: PubMed Central journal article supplement — BMJ Open Diabetes Res Care. 2020 Sep 28;8(1):e001225. doi: 10.1136/bmjdrc-2020-001225 (PMC7523197; doi:10.1136/bmjdrc-2020-001225), 2020-09-28
Supplement: bmjdrc-2020-001225supp001.pdf [file bmjdrc-2020-001225supp001.pdf]

|                            | Search strategy                                                                                      |
|----------------------------|------------------------------------------------------------------------------------------------------|
| Database                   | PubMed, ResearchGate, Embase and Cochrane                                                            |
| Limits                     | Language (in English), Species (studies on humans)                                                   |
| Type                       | Randomized controlled trial                                                                          |
| Data                       | 2008 to June, 2019                                                                                   |
| #1 (Terms of diabetes)     | Diabetes; diabetes mellitus                                                                          |
| #2 (Terms of mHealth)      | Telemedicine; mobile health; health, mobile; mHealth; telehealth, eHealth                            |
| #3 (Terms of hypertension) | Hypertension; blood pressure, high; blood pressures, high; high blood pressure; high blood pressures |
| Search                     | #1 and #2 or #2 and #3 or #1 and #2 and #3                                                           |

**Table 1** Search strategy of the research
