# Supplementary material for: Impact and efficacy of mobile health intervention in the management of diabetes and hypertension: a systematic review and meta-analysis
Source: PubMed Central journal article supplement — BMJ Open Diabetes Res Care. 2020 Sep 28;8(1):e001225. doi: 10.1136/bmjdrc-2020-001225 (PMC7523197; doi:10.1136/bmjdrc-2020-001225), 2020-09-28
Supplement: bmjdrc-2020-001225supp002.pdf [file bmjdrc-2020-001225supp002.pdf]

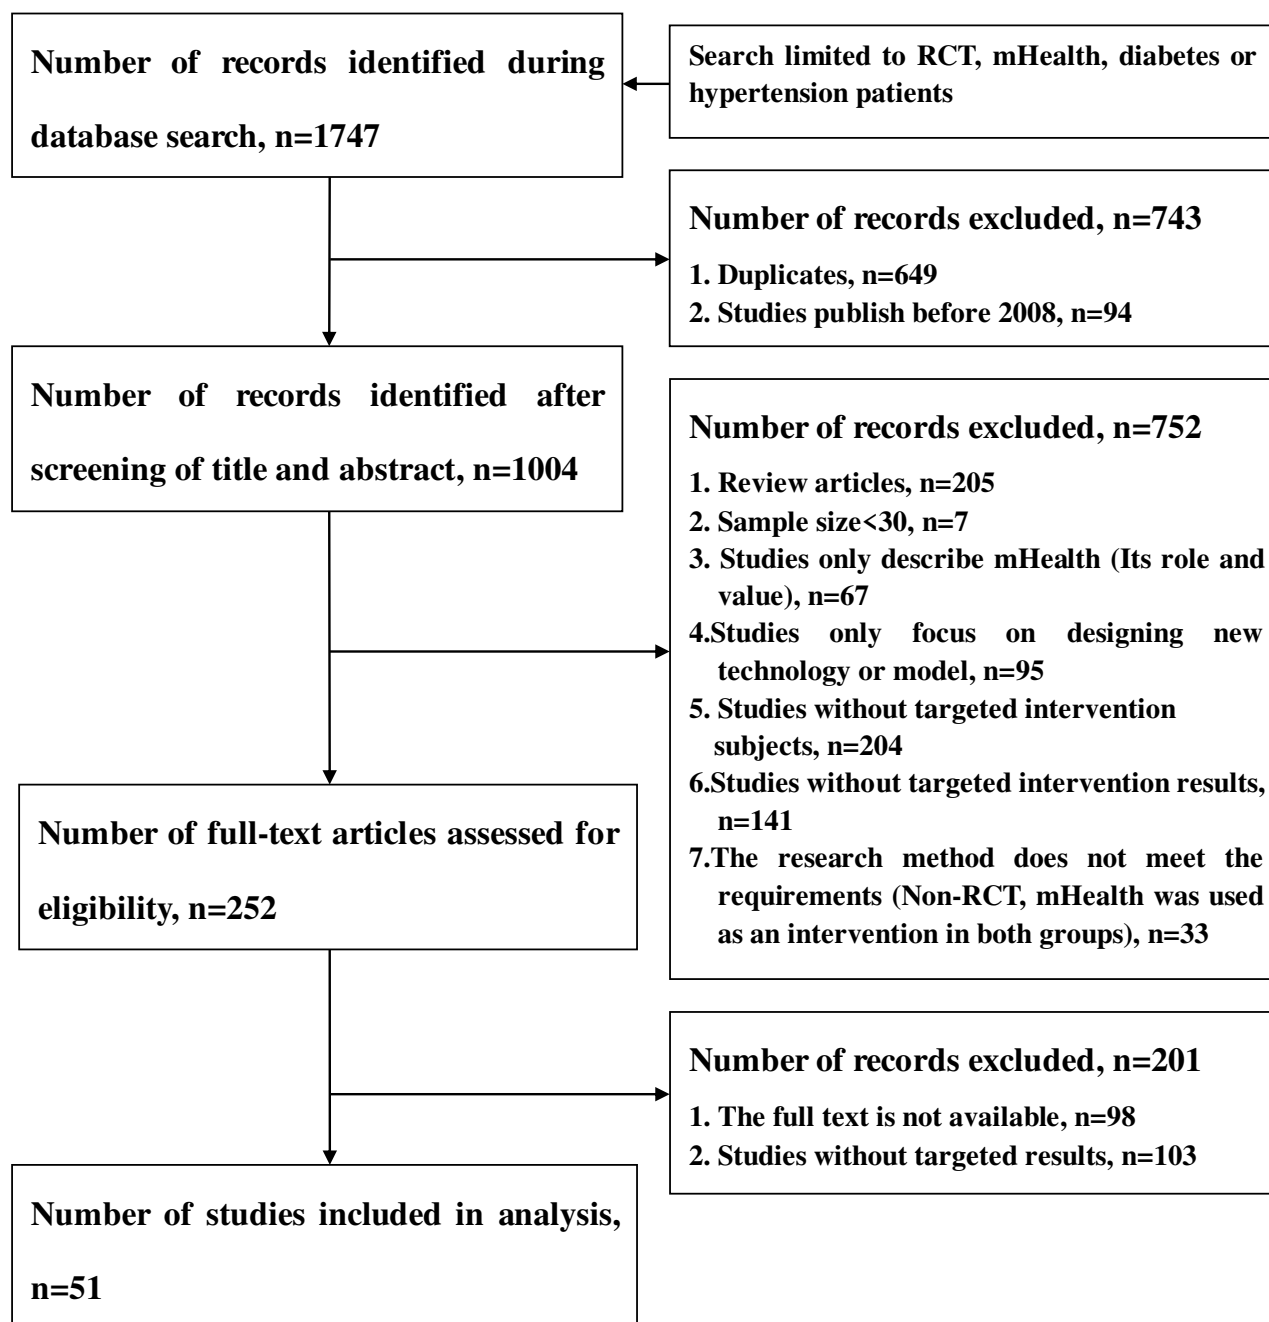

**Figure 1** Flow chart of the literature search and study selection procedures

RCT: Randomized controlled trial; mHealth: mobile health.
