# Supplementary material for: Impact and efficacy of mobile health intervention in the management of diabetes and hypertension: a systematic review and meta-analysis
Source: PubMed Central journal article supplement — BMJ Open Diabetes Res Care. 2020 Sep 28;8(1):e001225. doi: 10.1136/bmjdrc-2020-001225 (PMC7523197; doi:10.1136/bmjdrc-2020-001225), 2020-09-28
Supplement: bmjdrc-2020-001225supp004.pdf [file bmjdrc-2020-001225supp004.pdf]

| Study ID <sup>1</sup> | Author              | Randomisation | Description of randomisation methods | Double blind | Used identical placebo | Follow-up reporting | Total score |
|-----------------------|---------------------|---------------|--------------------------------------|--------------|------------------------|---------------------|-------------|
| 1                     | Goodarzi, M         | 1             | 1                                    | 0            | 0                      | 1                   | 3           |
| 2                     | Yaron, M            | 1             | 0                                    | 0            | 0                      | 1                   | 2           |
| 3                     | Ramadas, A          | 1             | 0                                    | 0            | 0                      | 1                   | 2           |
| 4                     | Abaza, H            | 1             | 1                                    | 0            | 0                      | 1                   | 3           |
| 5                     | Wild, S. H          | 1             | 1                                    | 0            | 0                      | 1                   | 3           |
| 6                     | Duruturk, N         | 1             | 1                                    | 0            | 0                      | 1                   | 3           |
| 7                     | Sarayani, A         | 1             | 1                                    | 0            | 0                      | 1                   | 3           |
| 8                     | Wang, G             | 1             | 0                                    | 0            | 0                      | 1                   | 2           |
| 9                     | Kim, H. S           | 1             | 1                                    | 0            | 0                      | 0                   | 2           |
| 10                    | Lim, S              | 1             | 1                                    | 0            | 0                      | 1                   | 3           |
| 11                    | Cho, J. H           | 1             | 1                                    | 0            | 0                      | 0                   | 2           |
| 12                    | Kleinman, N. J      | 1             | 1                                    | 0            | 0                      | 1                   | 3           |
| 13                    | Fortmann, A. L      | 1             | 1                                    | 0            | 0                      | 1                   | 3           |
| 14                    | Jeong, J. Y         | 1             | 0                                    | 0            | 0                      | 1                   | 2           |
| 15                    | Kempf, K            | 1             | 1                                    | 0            | 0                      | 1                   | 3           |
| 16                    | Nicolucci, A        | 1             | 1                                    | 0            | 0                      | 1                   | 3           |
| 17                    | Wakefield, B. J     | 1             | 1                                    | 0            | 0                      | 1                   | 3           |
| 18                    | Chamany, S          | 1             | 1                                    | 0            | 0                      | 1                   | 3           |
| 19                    | Basudev, N          | 1             | 1                                    | 0            | 0                      | 1                   | 3           |
| 20                    | Rossi, M. C. E      | 1             | 1                                    | 0            | 0                      | 1                   | 3           |
| 21                    | Odnoletkova, I      | 1             | 1                                    | 0            | 0                      | 1                   | 3           |
| 22                    | Baron, J. S         | 1             | 1                                    | 0            | 0                      | 1                   | 3           |
| 23                    | Di, Bartolo P       | 1             | 0                                    | 0            | 0                      | 1                   | 2           |
| 24                    | Benson, G. A        | 1             | 0                                    | 0            | 0                      | 1                   | 2           |
| 25                    | Boaz, M             | 1             | 0                                    | 0            | 0                      | 1                   | 2           |
| 26                    | Liou, J. K          | 1             | 0                                    | 0            | 0                      | 1                   | 2           |
| 27                    | Rossi, M. C. E      | 1             | 1                                    | 0            | 0                      | 1                   | 3           |
| 28                    | Davis, R. M         | 1             | 0                                    | 0            | 0                      | 0                   | 1           |
| 29                    | Shea, S             | 1             | 0                                    | 0            | 0                      | 1                   | 2           |
| 30                    | Kirwan, M           | 1             | 1                                    | 0            | 0                      | 1                   | 3           |
| 31                    | Moattari, M         | 1             | 1                                    | 0            | 0                      | 1                   | 3           |
| 32                    | Rossi, Mc           | 1             | 1                                    | 0            | 0                      | 1                   | 3           |
| 33                    | Zhou, P             | 1             | 1                                    | 0            | 0                      | 1                   | 3           |
| 34                    | Tang, P             | 1             | 1                                    | 0            | 0                      | 1                   | 3           |
| 35                    | Piette, J. D        | 1             | 1                                    | 0            | 0                      | 0                   | 2           |
| 36                    | Cho, J. H           | 1             | 1                                    | 0            | 0                      | 1                   | 3           |
| 37                    | Bujnowska-Fedak, Mm | 1             | 0                                    | 0            | 0                      | 1                   | 2           |
| 38                    | Berndt, R-D         | 1             | 0                                    | 0            | 0                      | 0                   | 2           |
| 39                    | Charpentier, G      | 1             | 1                                    | 0            | 0                      | 1                   | 3           |

|    |                |   |   |   |   |   |   |
|----|----------------|---|---|---|---|---|---|
| 40 | Kim, S. I      | 1 | 1 | 0 | 0 | 1 | 3 |
| 41 | Piette, J. D   | 1 | 1 | 0 | 0 | 0 | 2 |
| 42 | Bobrow, K      | 1 | 1 | 0 | 0 | 1 | 3 |
| 43 | Kim, Y. N      | 1 | 1 | 0 | 0 | 1 | 3 |
| 44 | McManus, R. J  | 1 | 1 | 0 | 0 | 1 | 3 |
| 45 | Margolis, K. L | 1 | 0 | 0 | 0 | 1 | 2 |
| 46 | Green, B. B    | 1 | 1 | 0 | 0 | 1 | 3 |
| 47 | McManus, R. J  | 1 | 1 | 0 | 0 | 1 | 3 |
| 48 | Rifkin, D. E   | 1 | 1 | 0 | 0 | 1 | 3 |
| 49 | Lee, P         | 1 | 1 | 0 | 0 | 1 | 3 |
| 50 | Kim, J. Y      | 1 | 0 | 0 | 0 | 0 | 1 |
| 51 | McKinstry, B   | 1 | 1 | 0 | 0 | 1 | 3 |

**Table 2** The quality assessment of the included studies

<sup>1</sup>Study IDs indicate the 1st to 51th study. Jadad scores range from 0 (very poor) to 5 (rigorous) and consist of points: Randomization (randomized=1 point; table of random numbers or computer-generated randomization=additional 1 point), double blindness (double blind=1 point; use masking such as identical placebo=additional 1 point), and follow-up (stating numbers of subjects withdrawn and the reasons for them in each group of a study=1 point).
