# Supplementary figures and images for: Impact and efficacy of mobile health intervention in the management of diabetes and hypertension: a systematic review and meta-analysis
Source: PubMed Central journal article supplement — BMJ Open Diabetes Res Care. 2020 Sep 28;8(1):e001225. doi: 10.1136/bmjdrc-2020-001225 (PMC7523197; doi:10.1136/bmjdrc-2020-001225), 2020-09-28

# A

## HbA1c

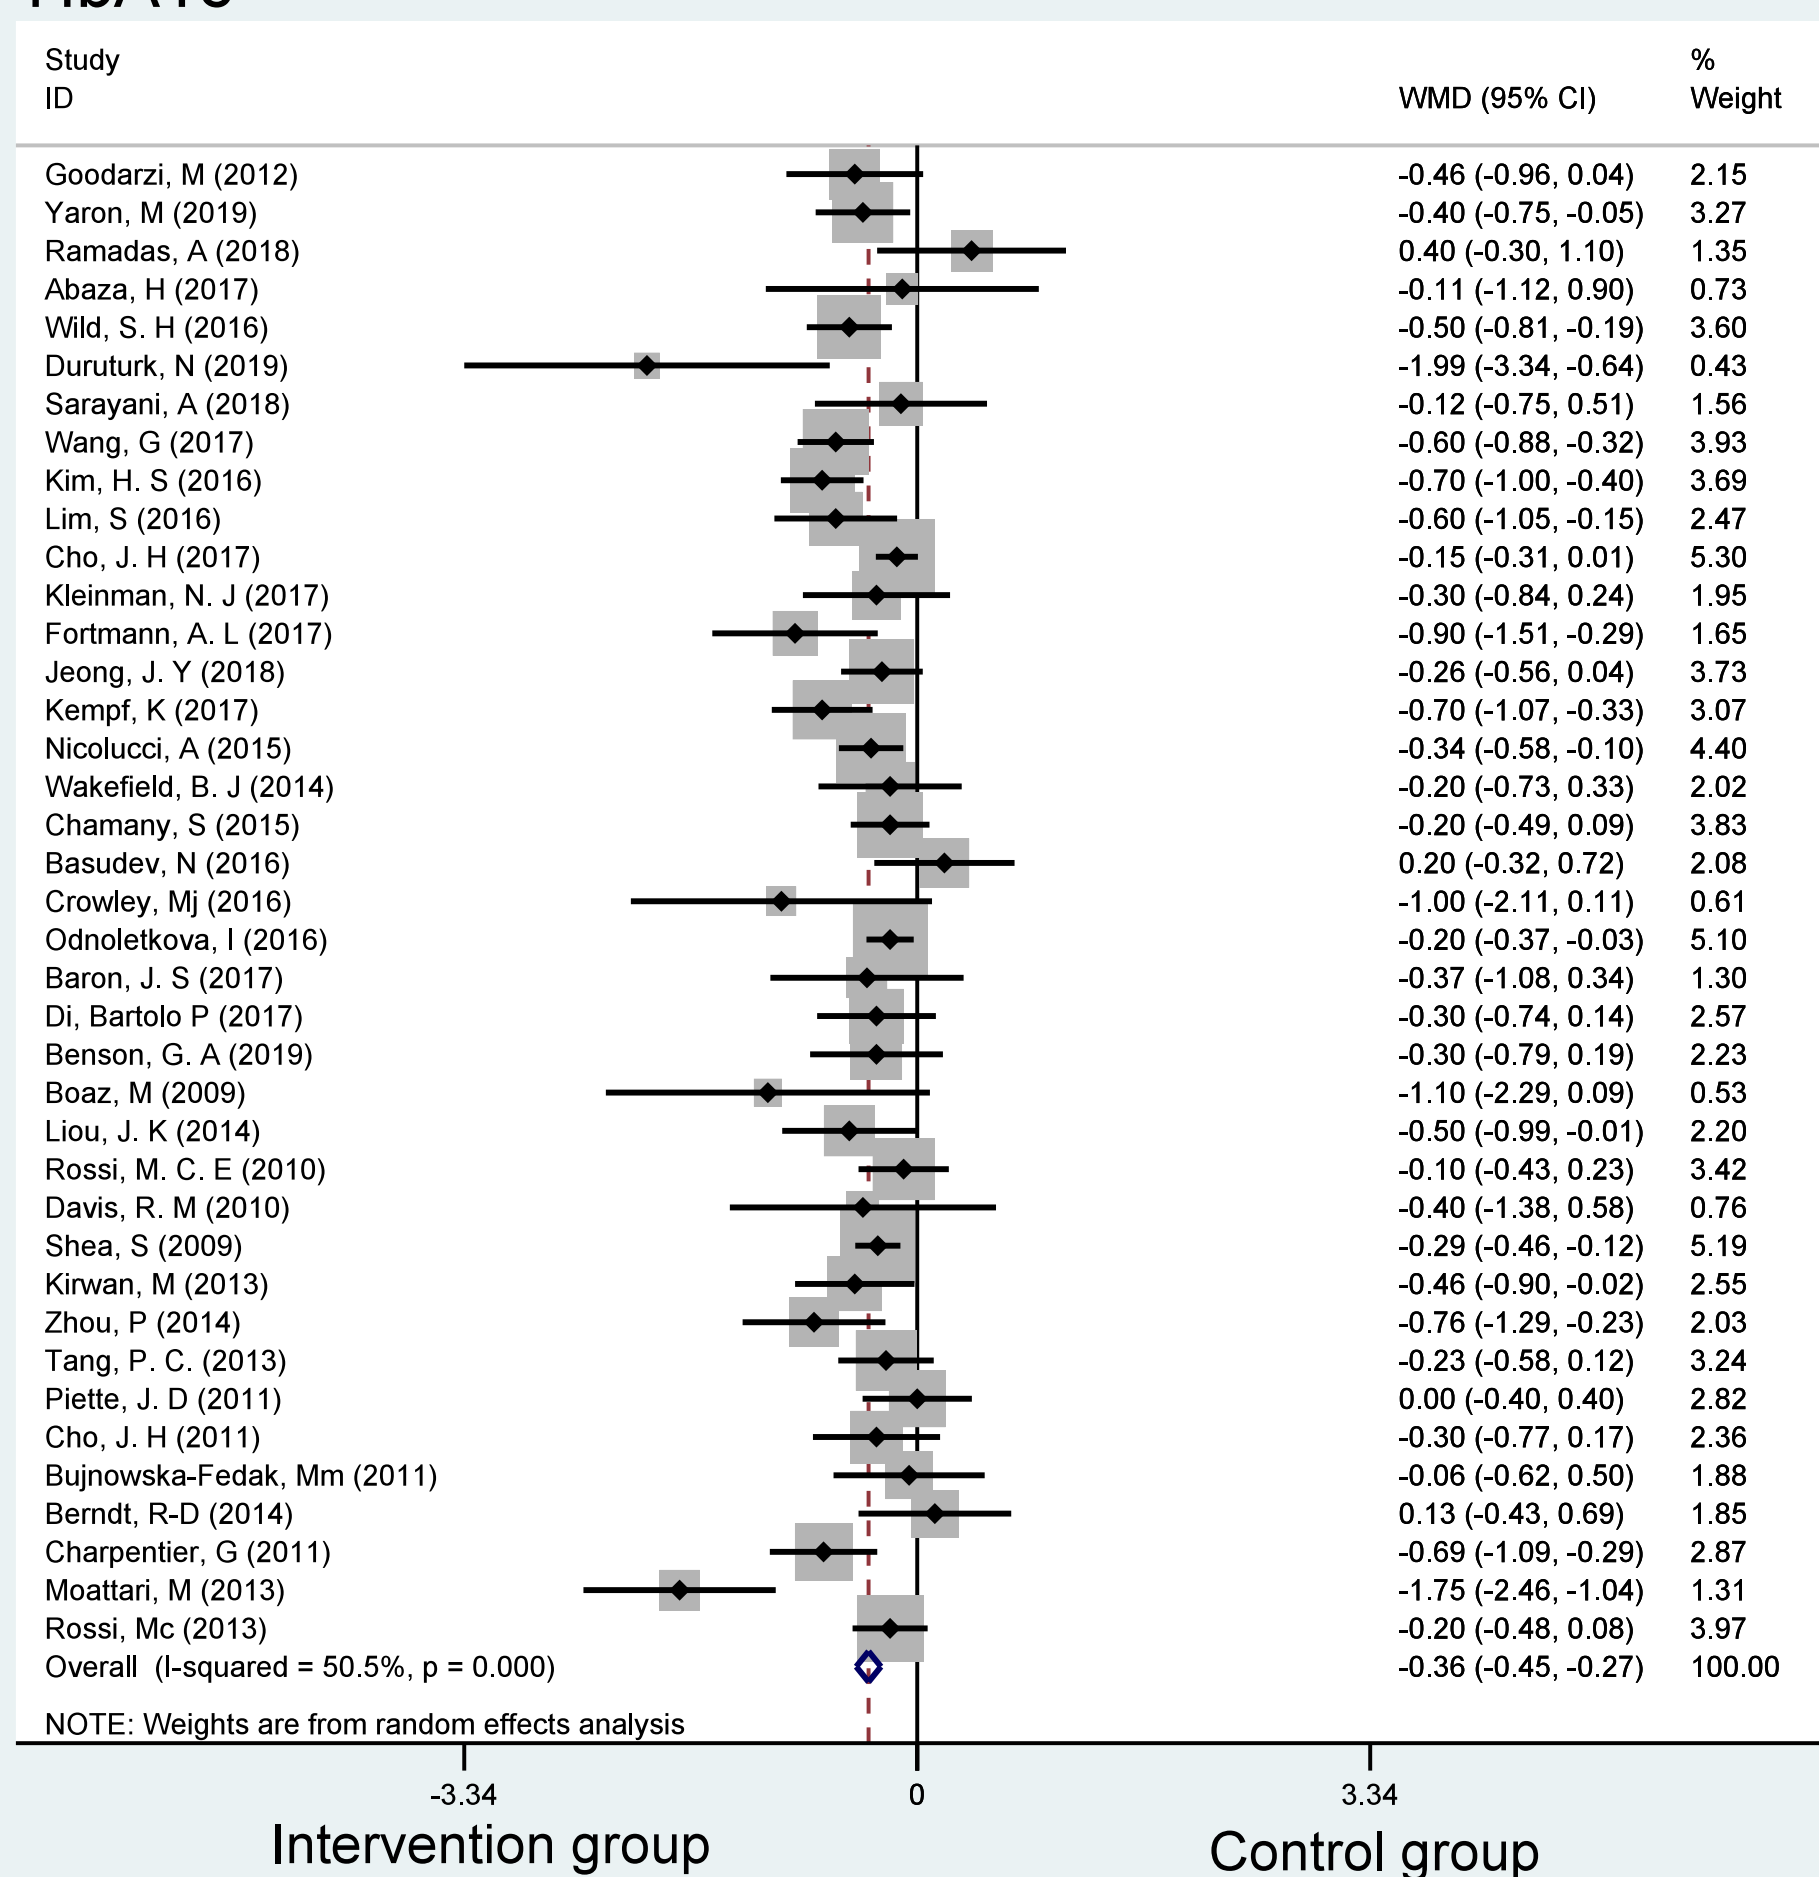

# B

## FBG

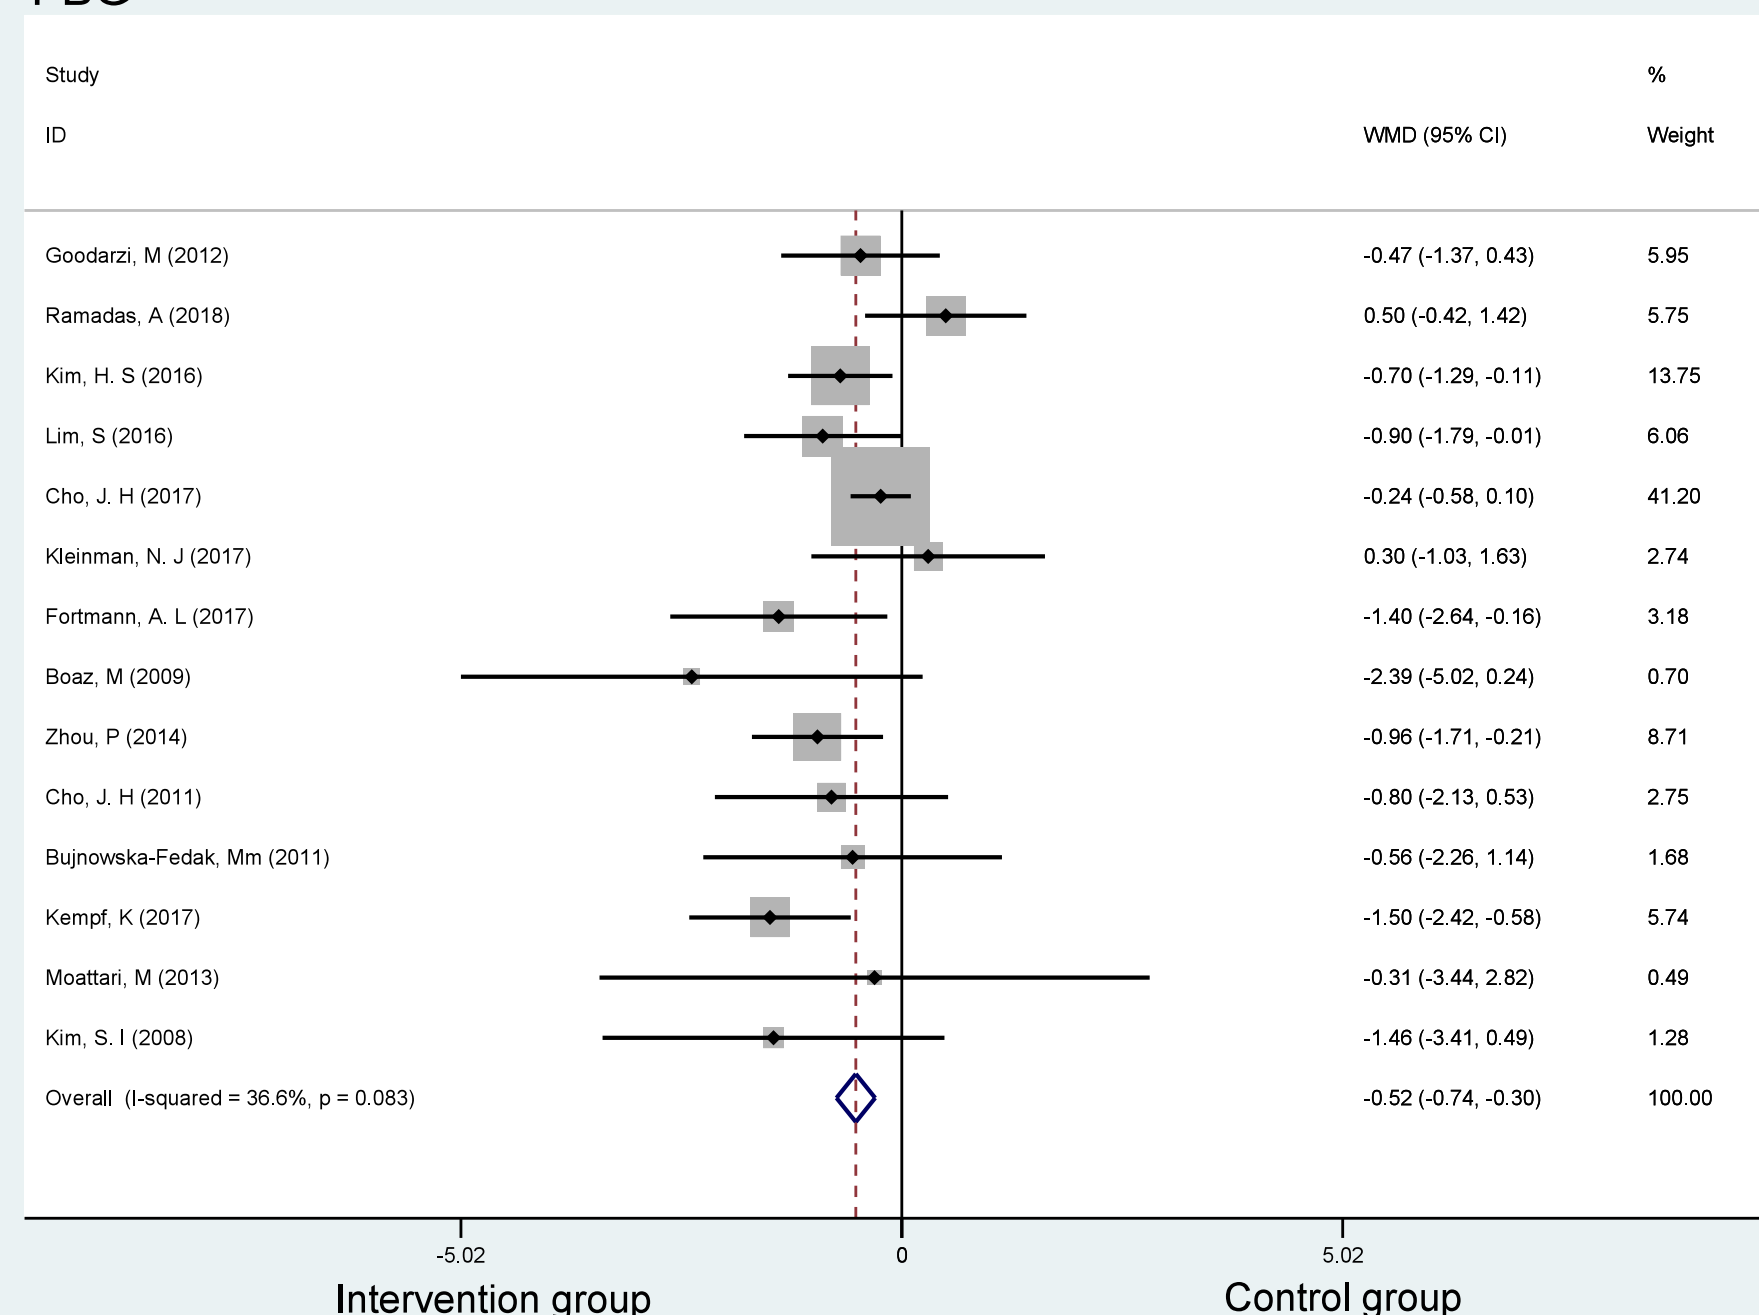

# C

## SBP

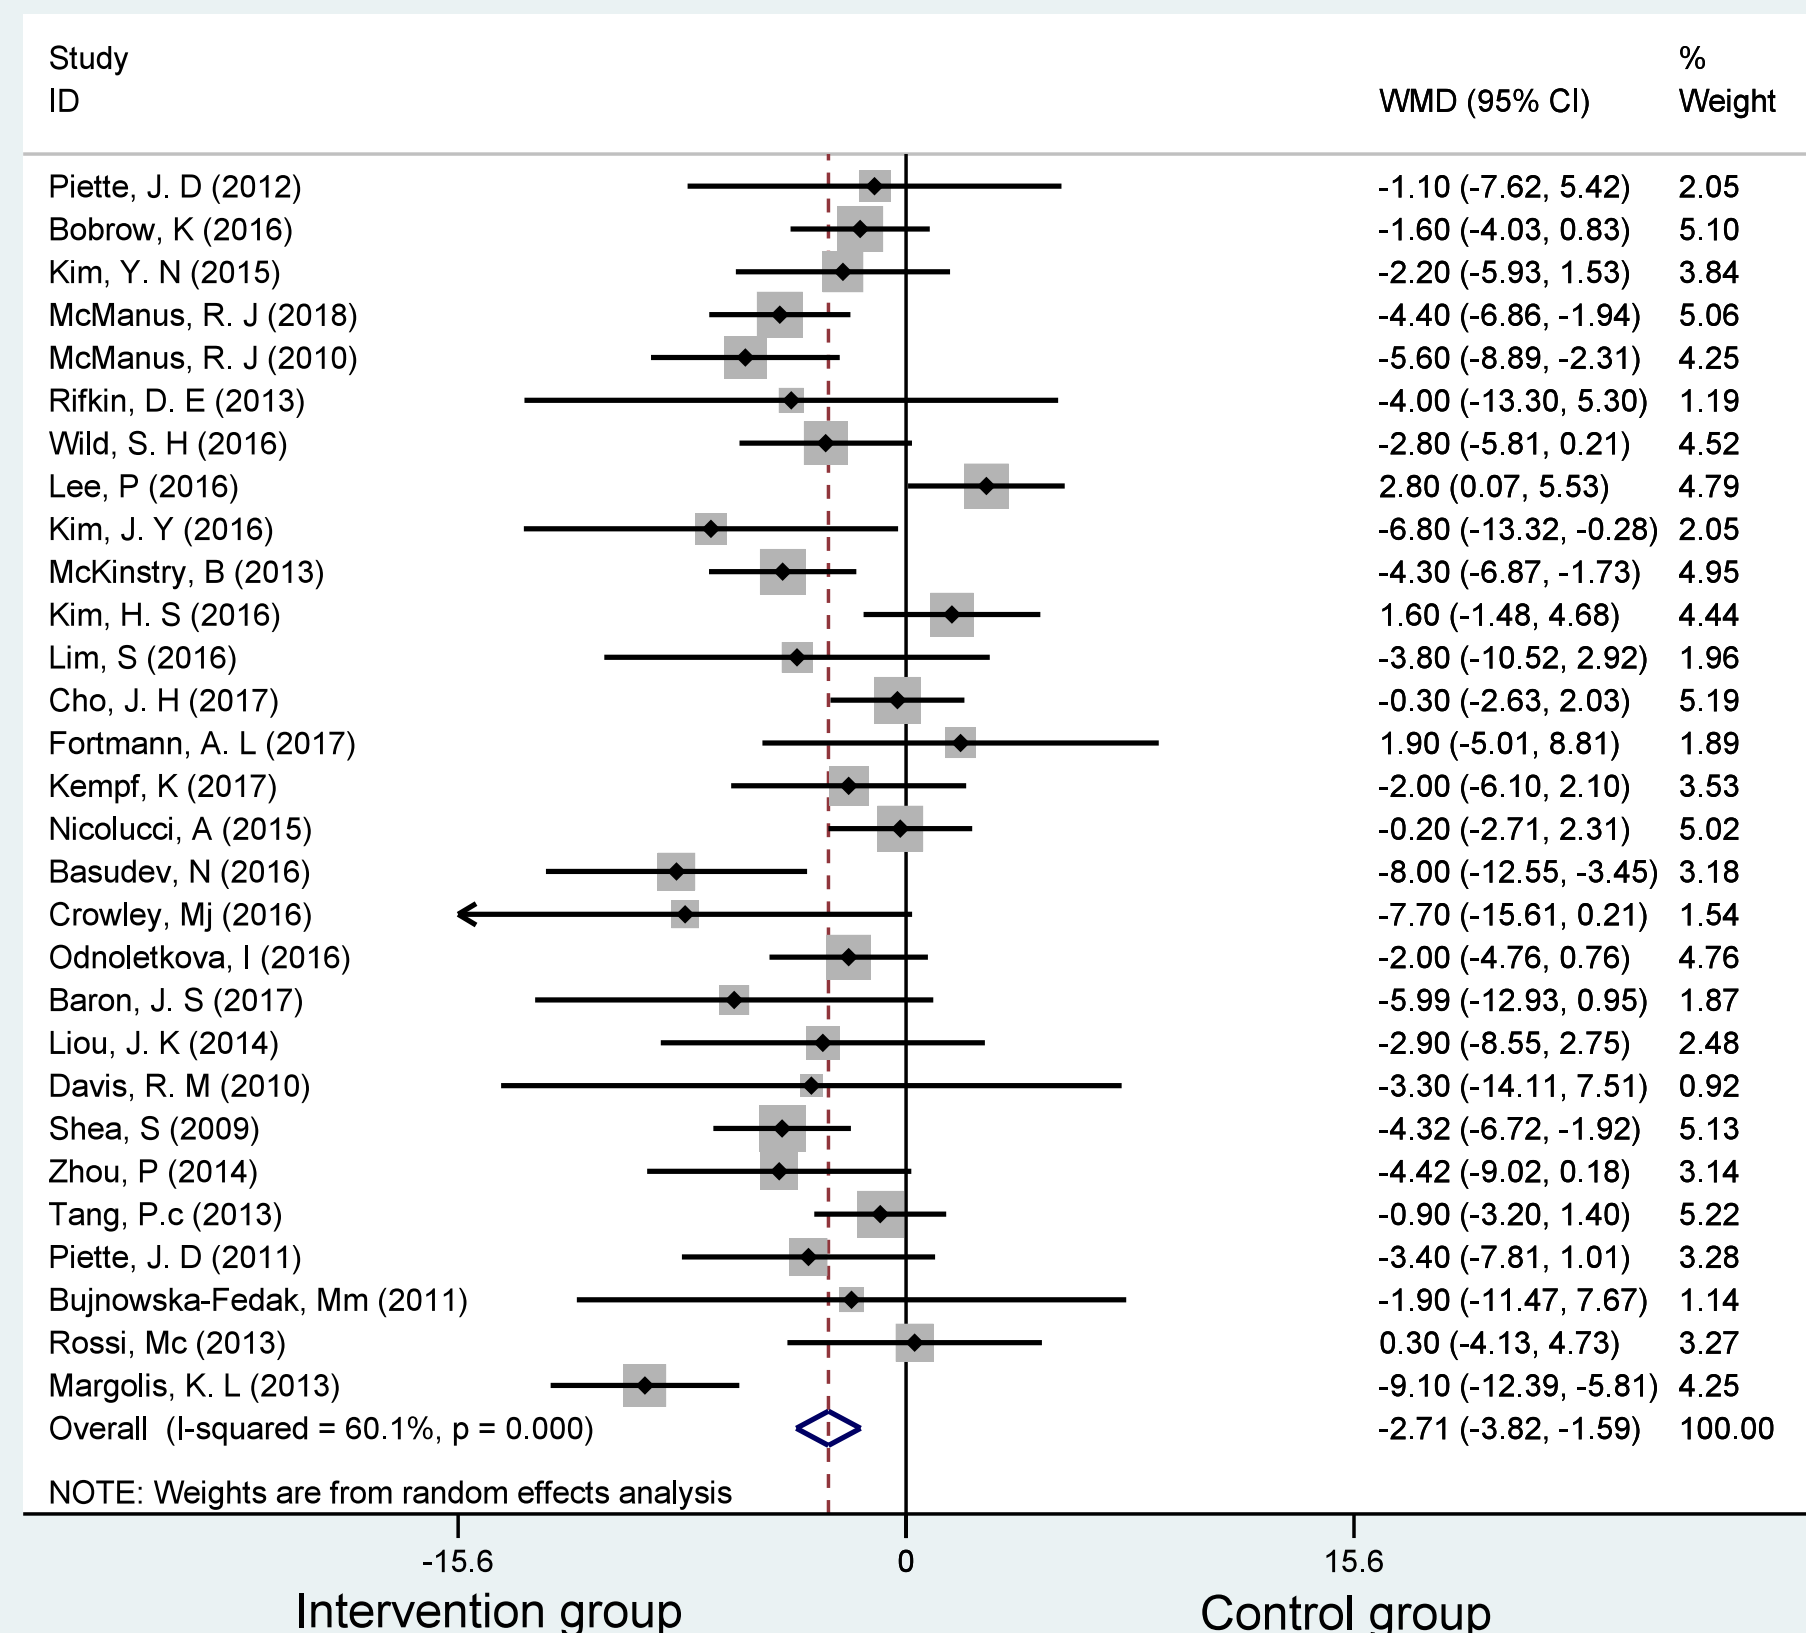

# D

## SBP

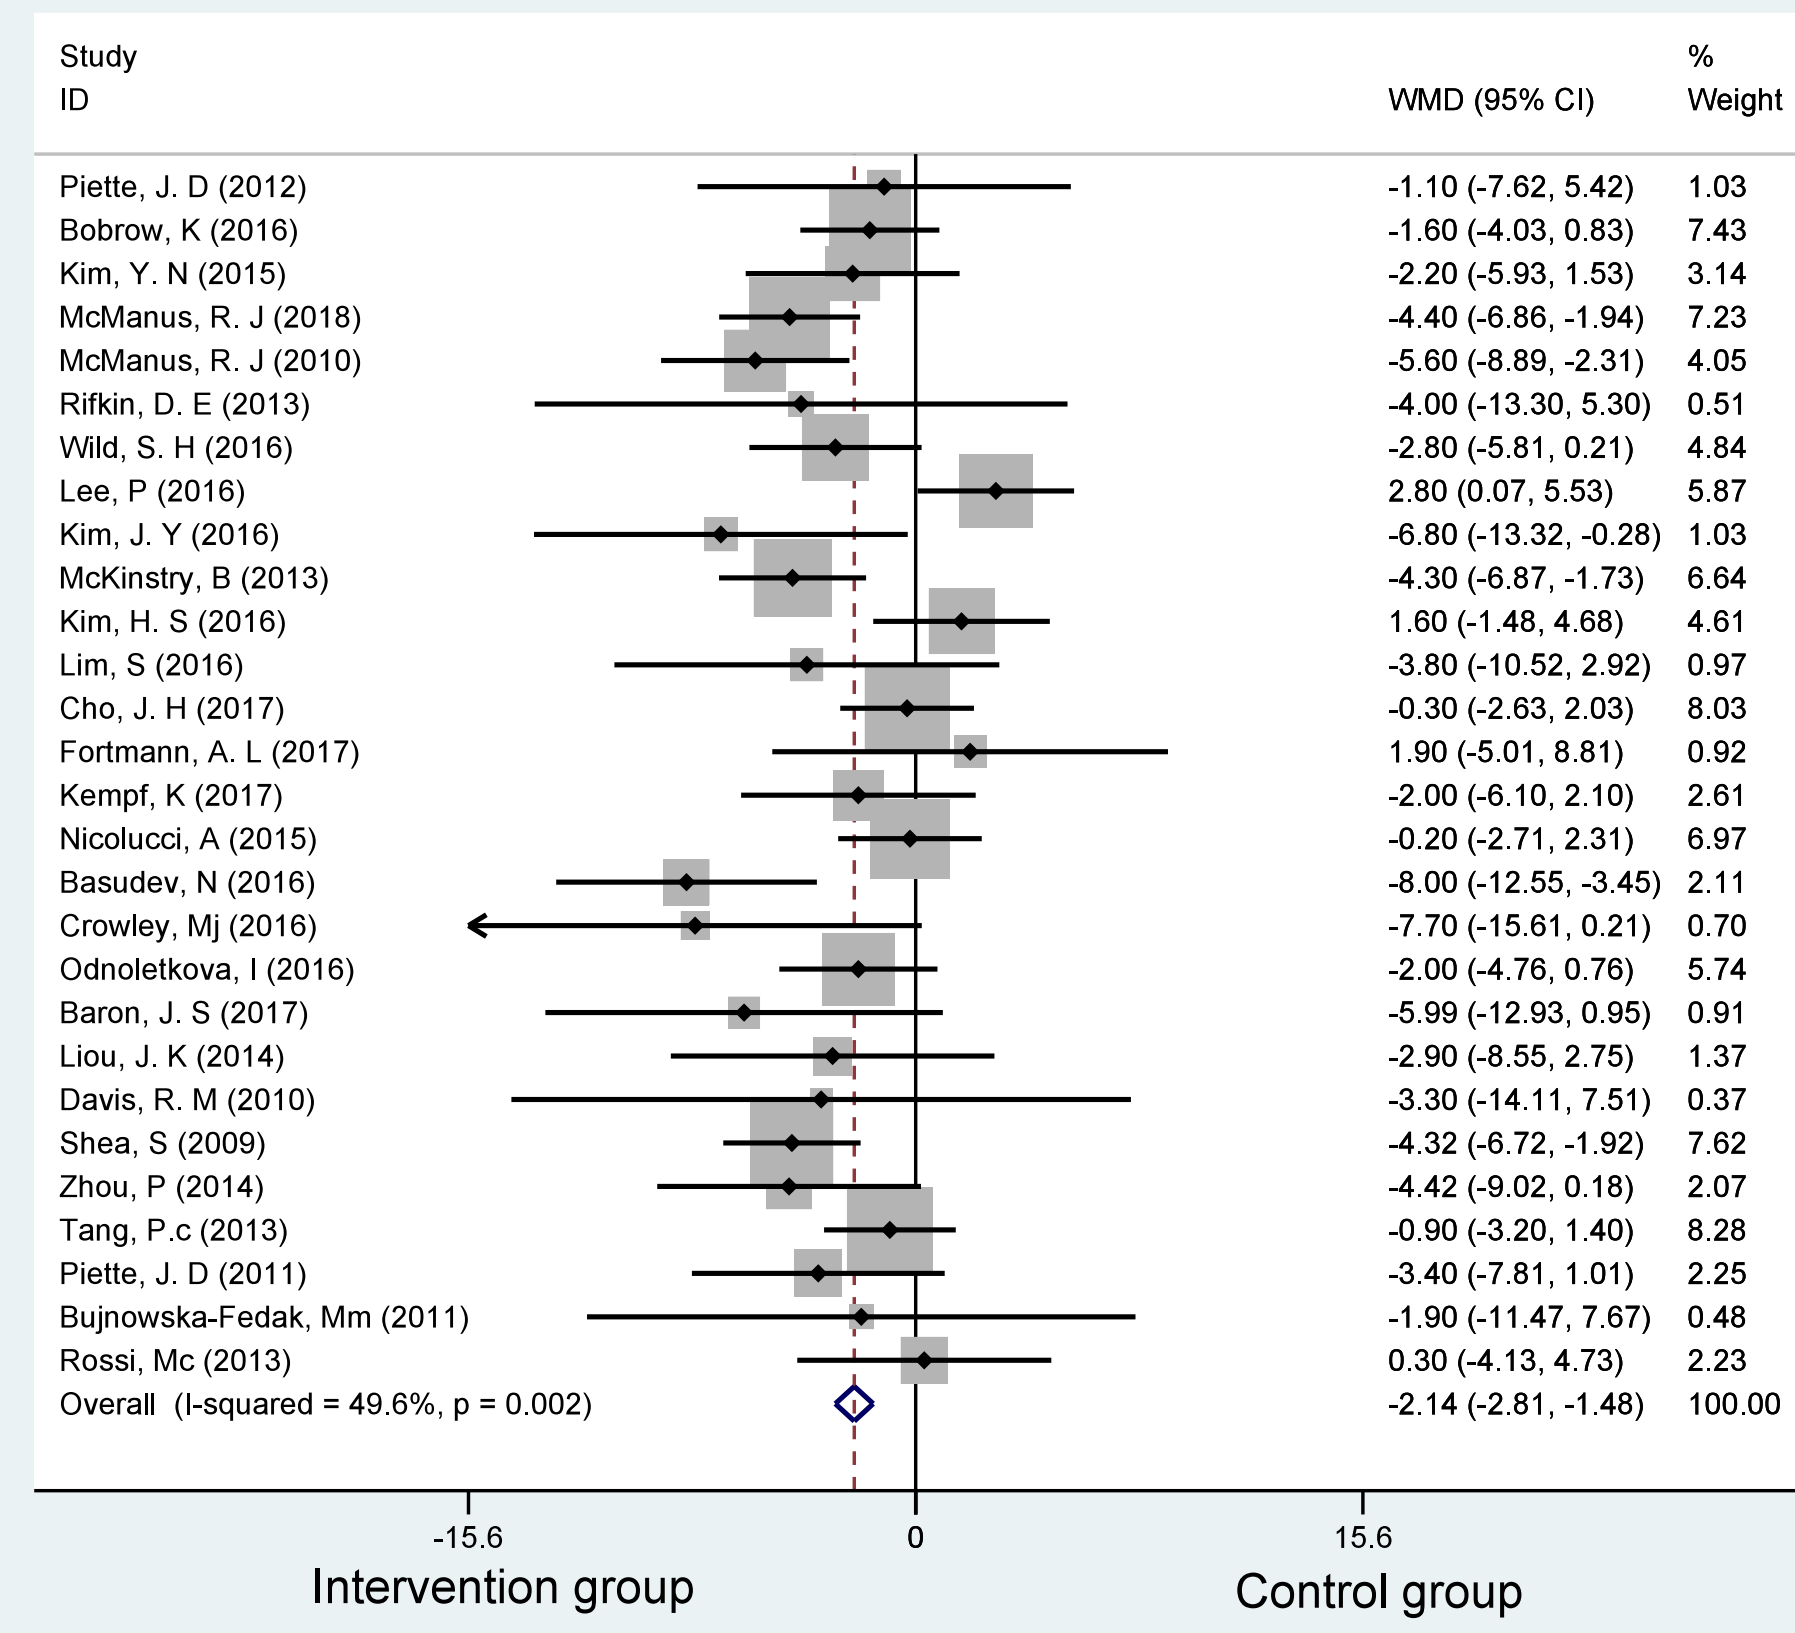

# E

## DBP

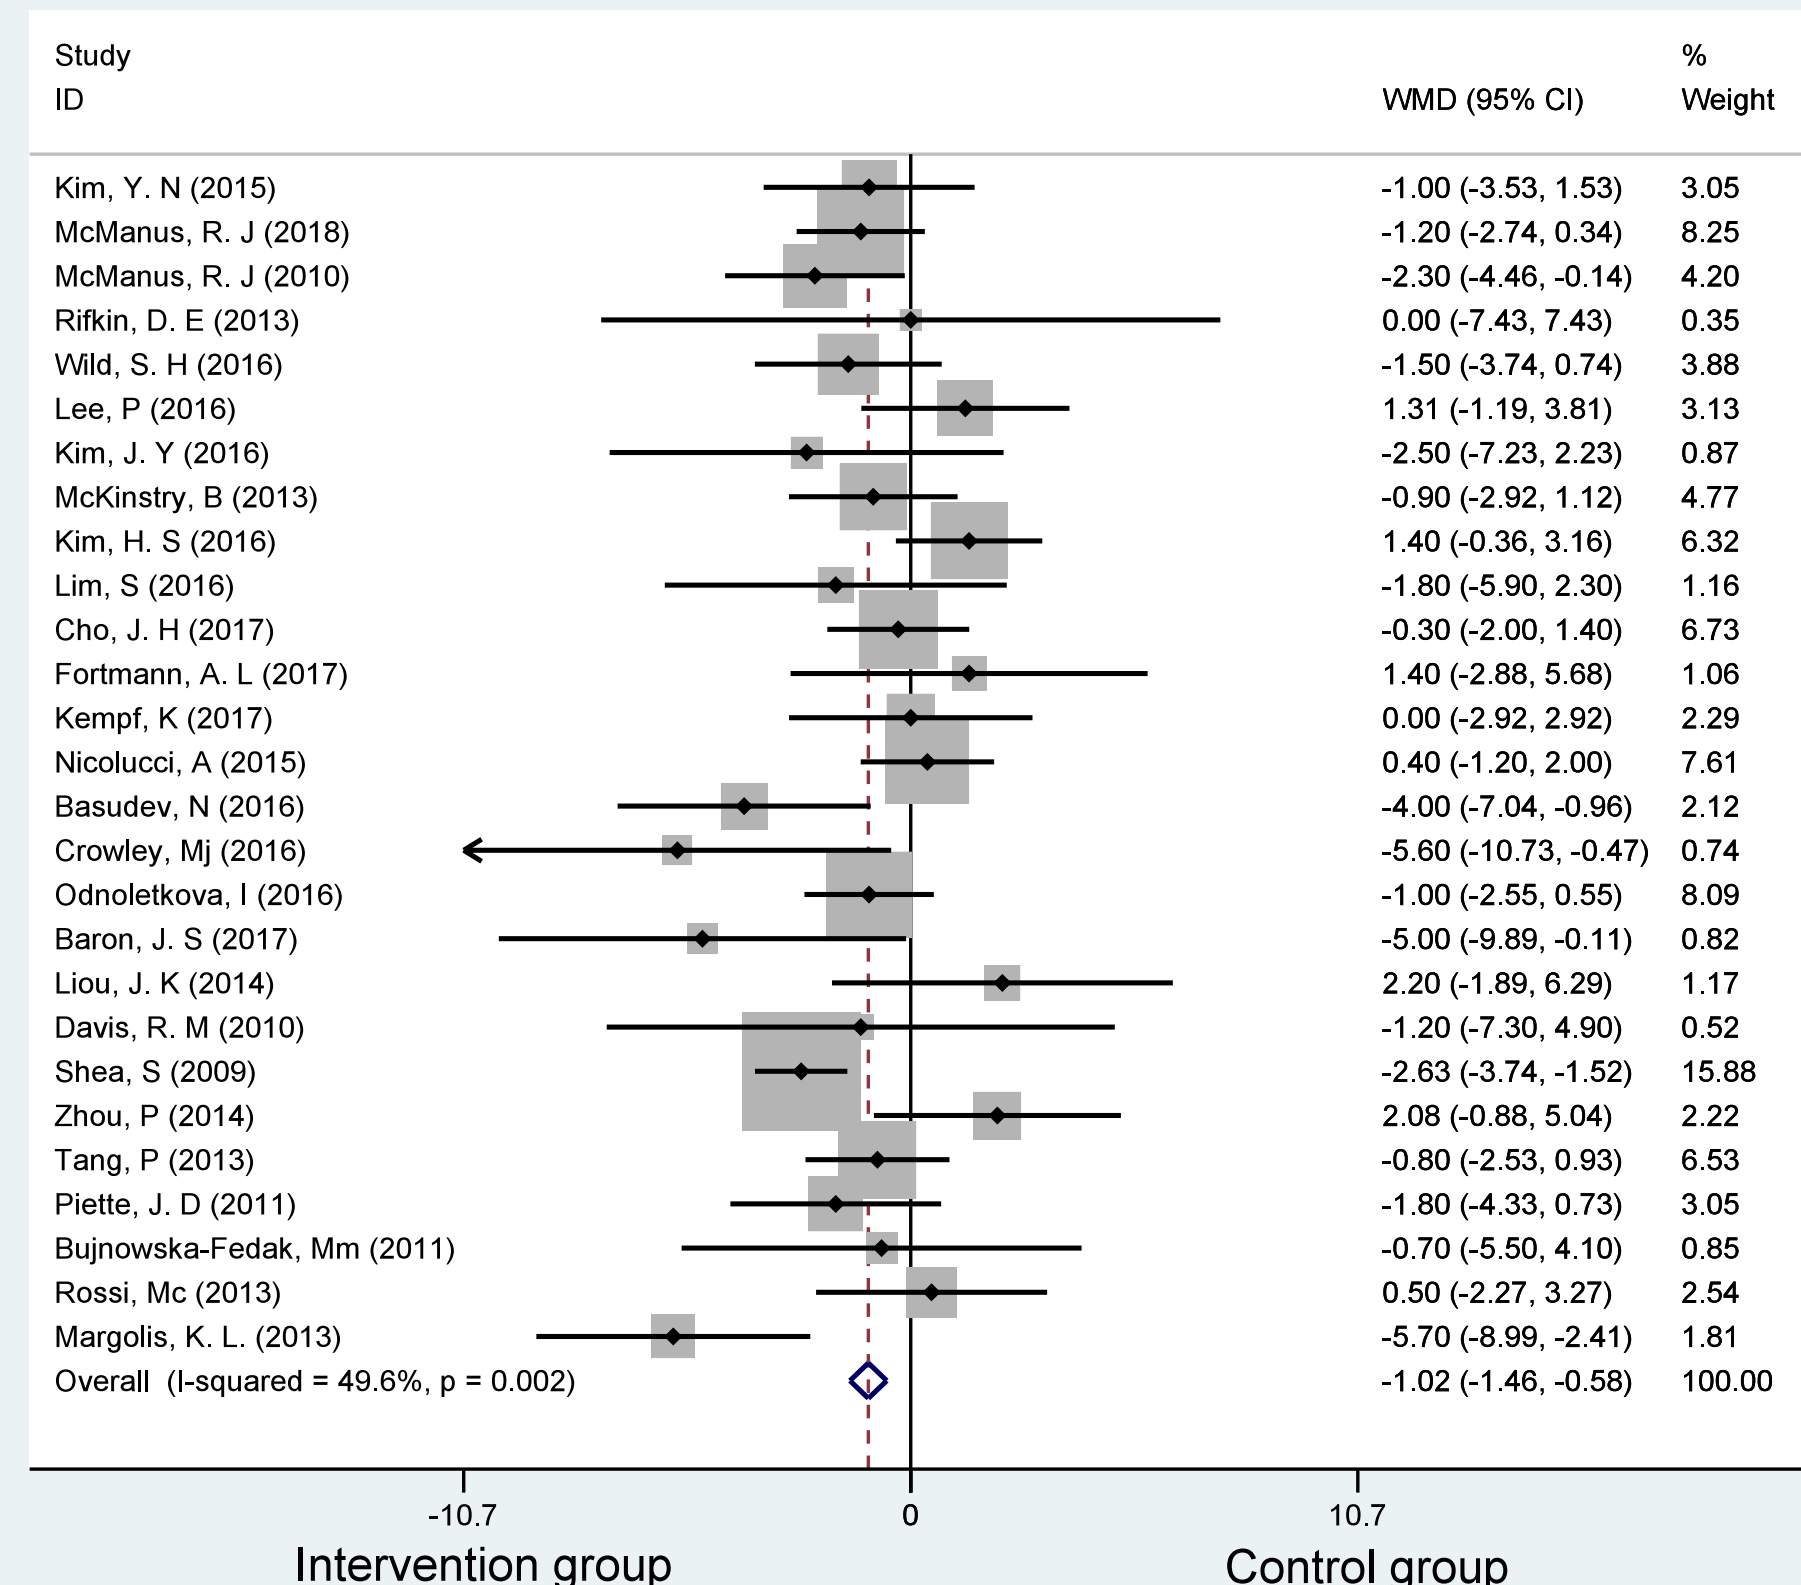

# F

## DBP

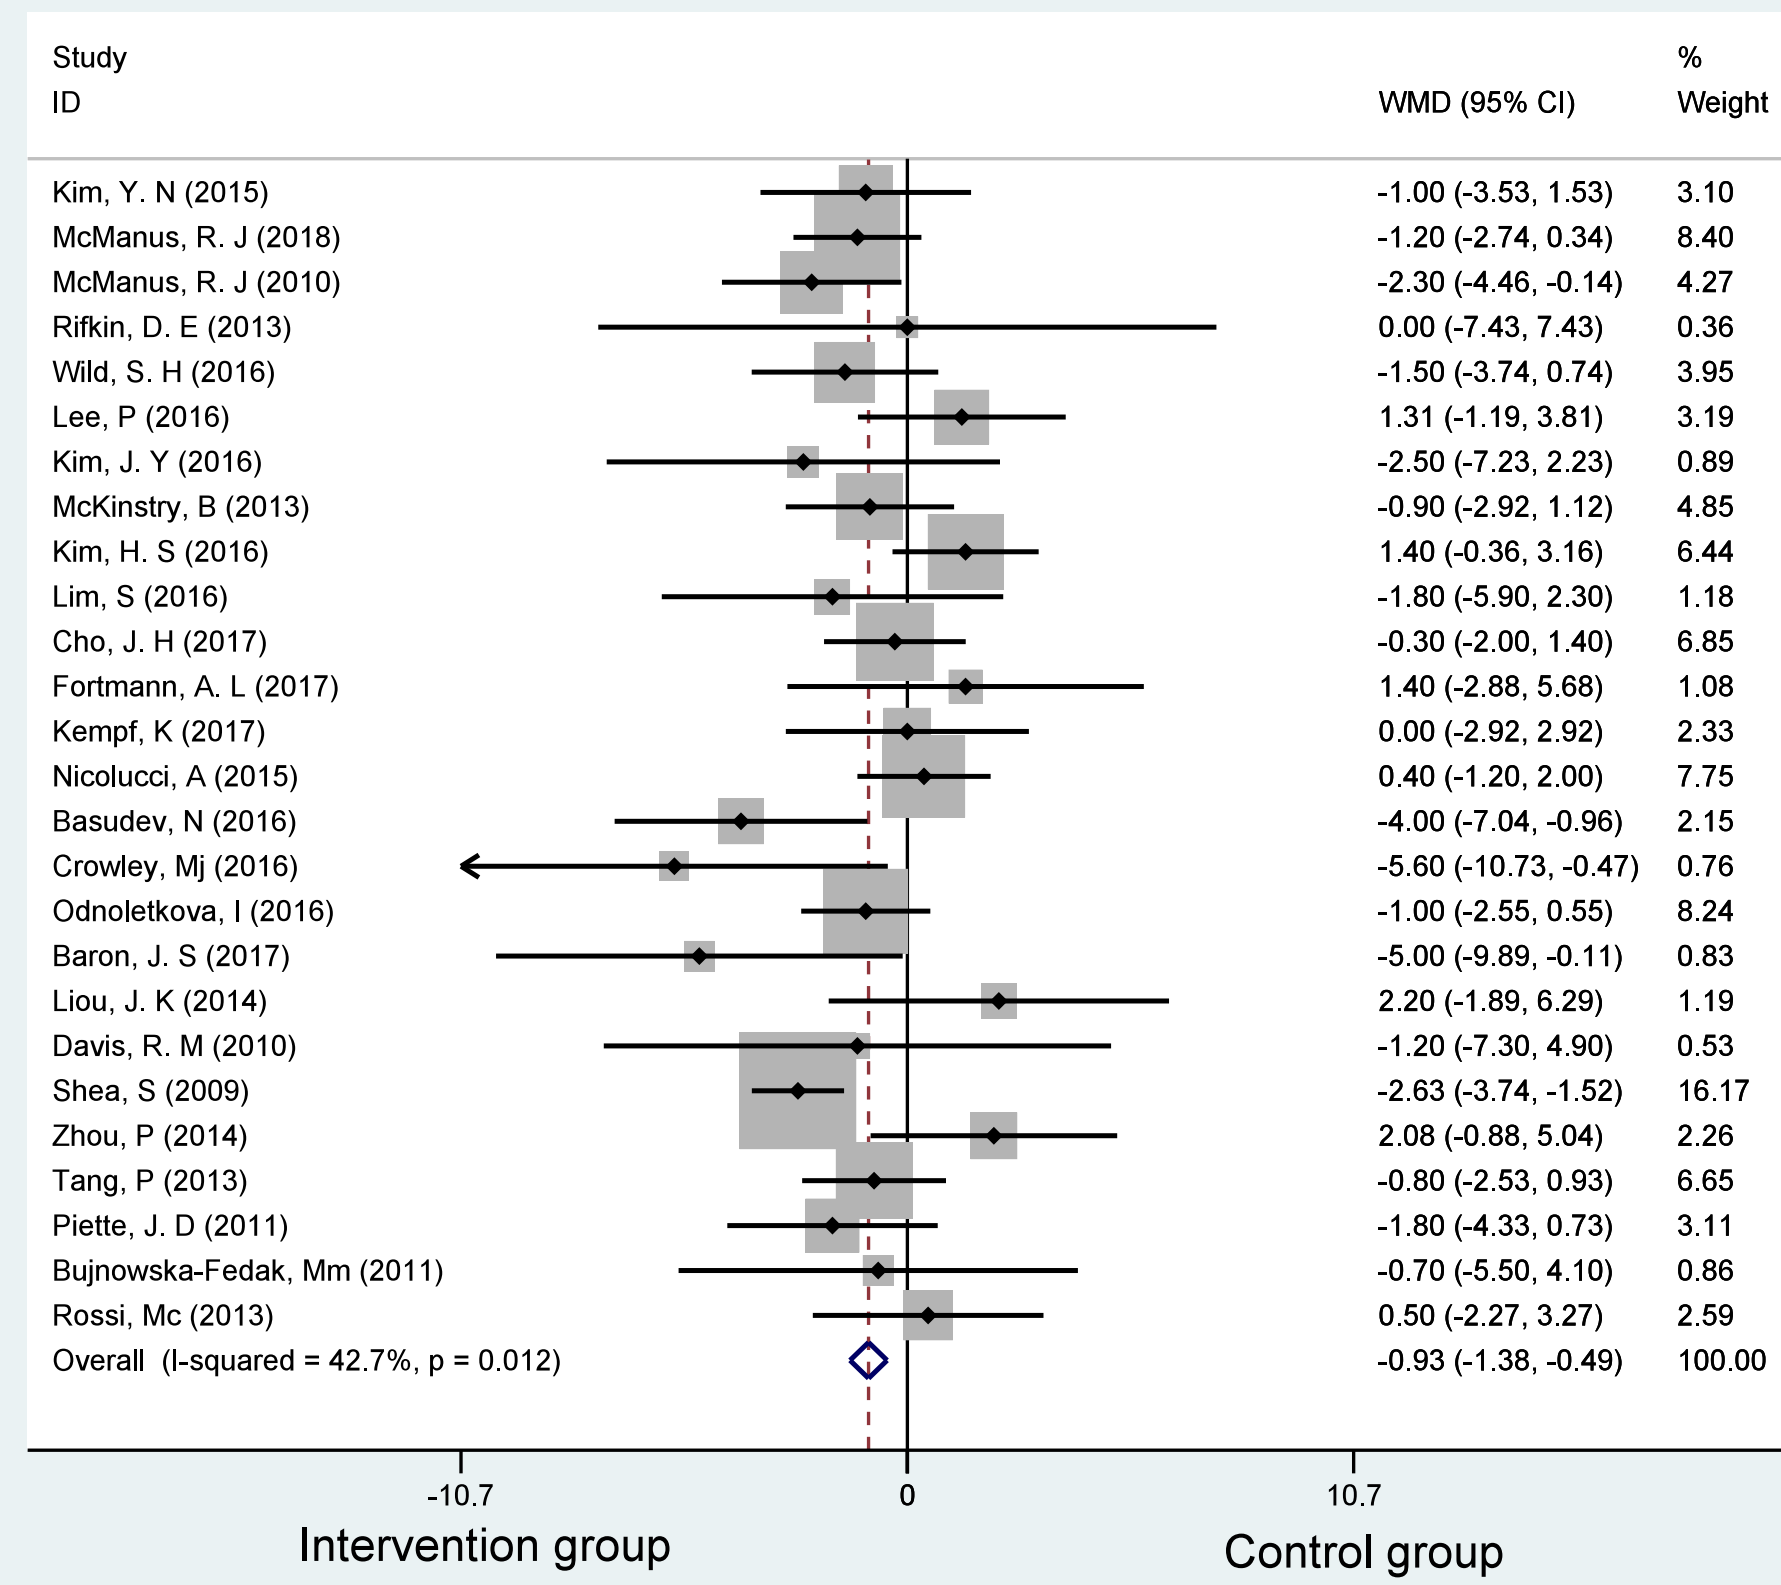

Figure 2 Sensitivity Analysis of HbA1c, FBG, SBP, DBP

Supplement: bmjdrc-2020-001225supp003.pdf [file bmjdrc-2020-001225supp003.pdf]
